# Supplementary figures and images for: Exploring nitrogen-mediated effects on Fe and Cu cluster development in graphene: a DFT study
Source: Royal Society of Chemistry journal article supplement (doi:10.1039/d4nr02713b), 2024-01-01

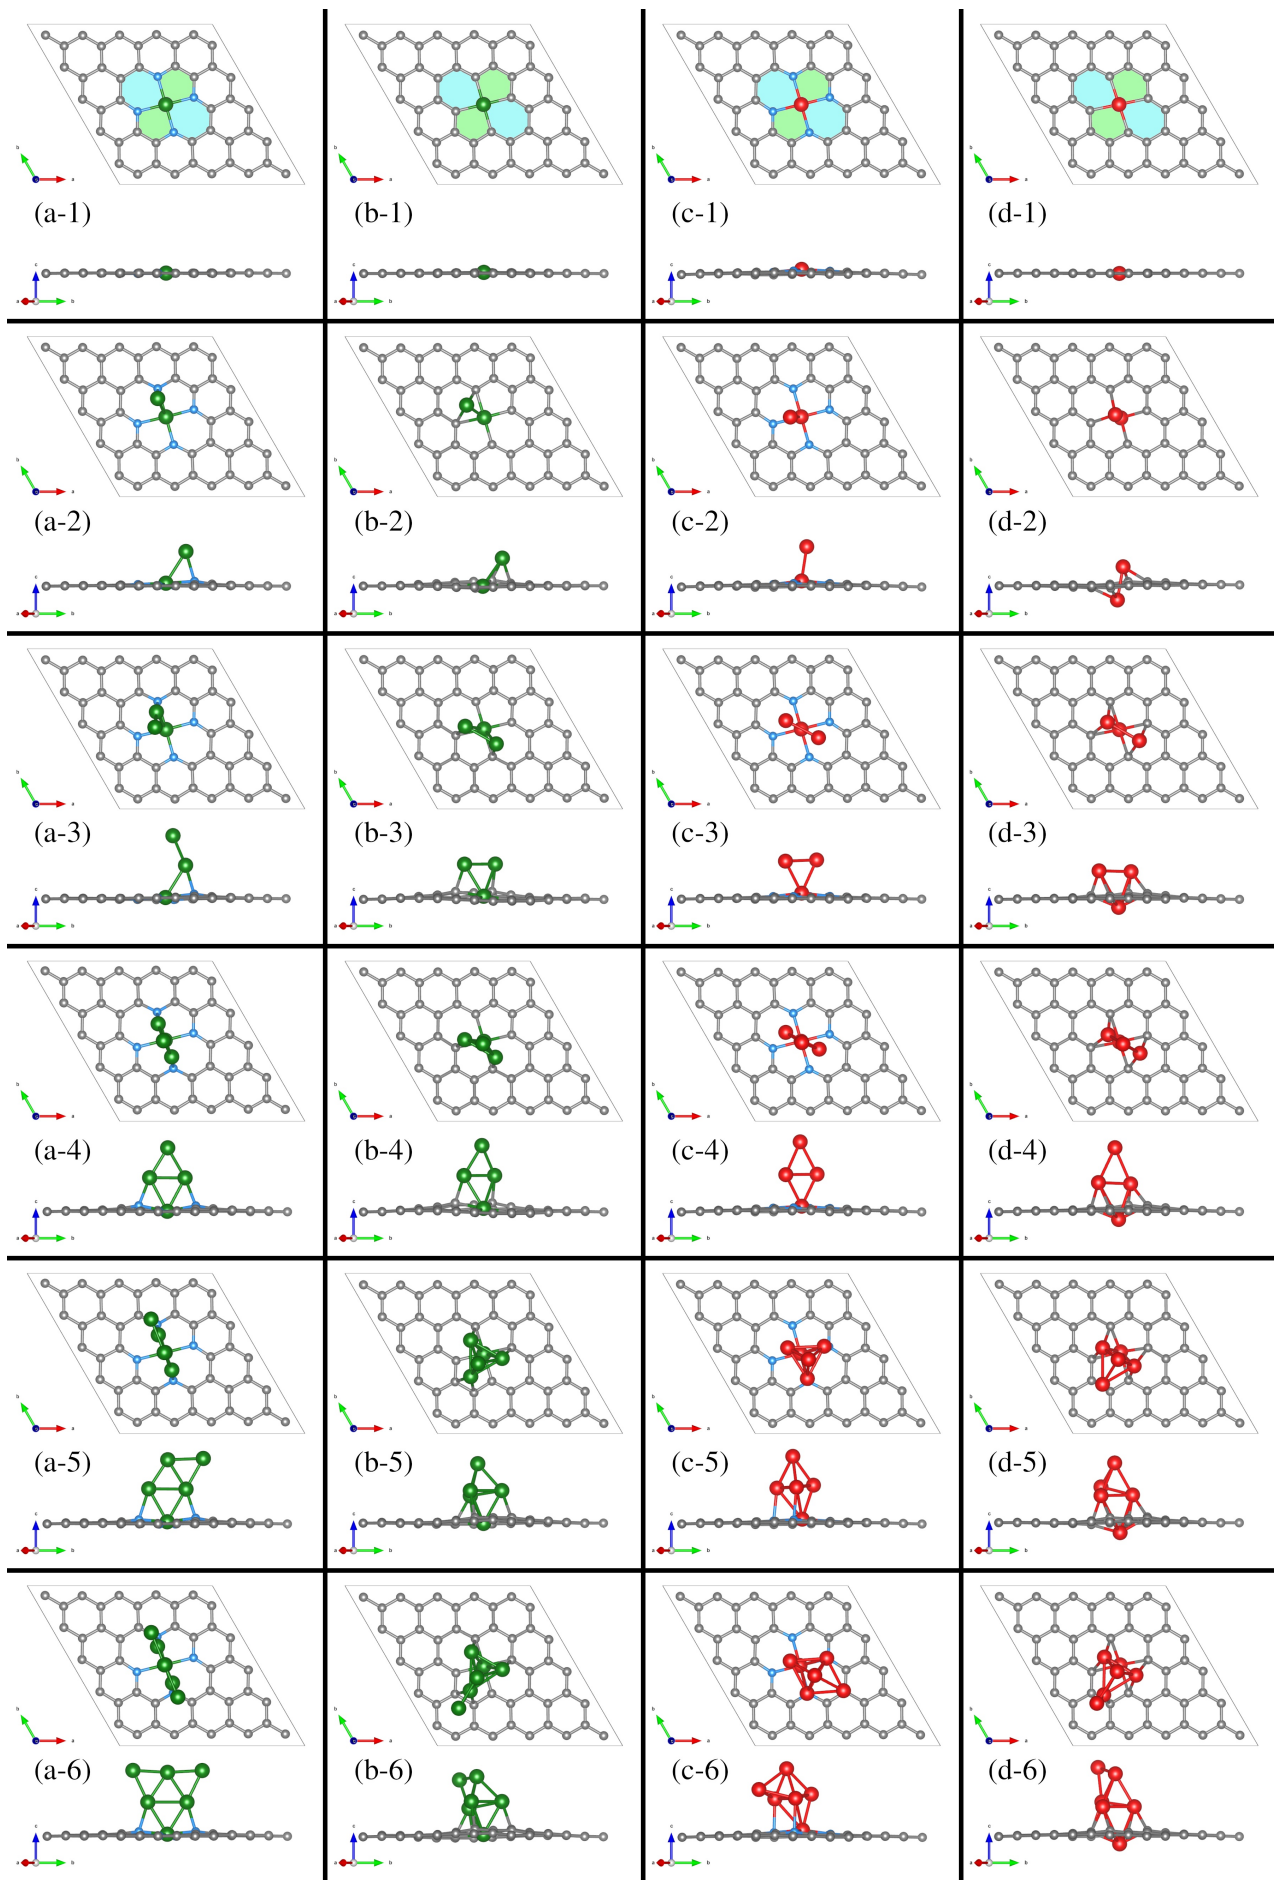

Supplement: d4nr02713b1.pdf [file d4nr02713b1.pdf]

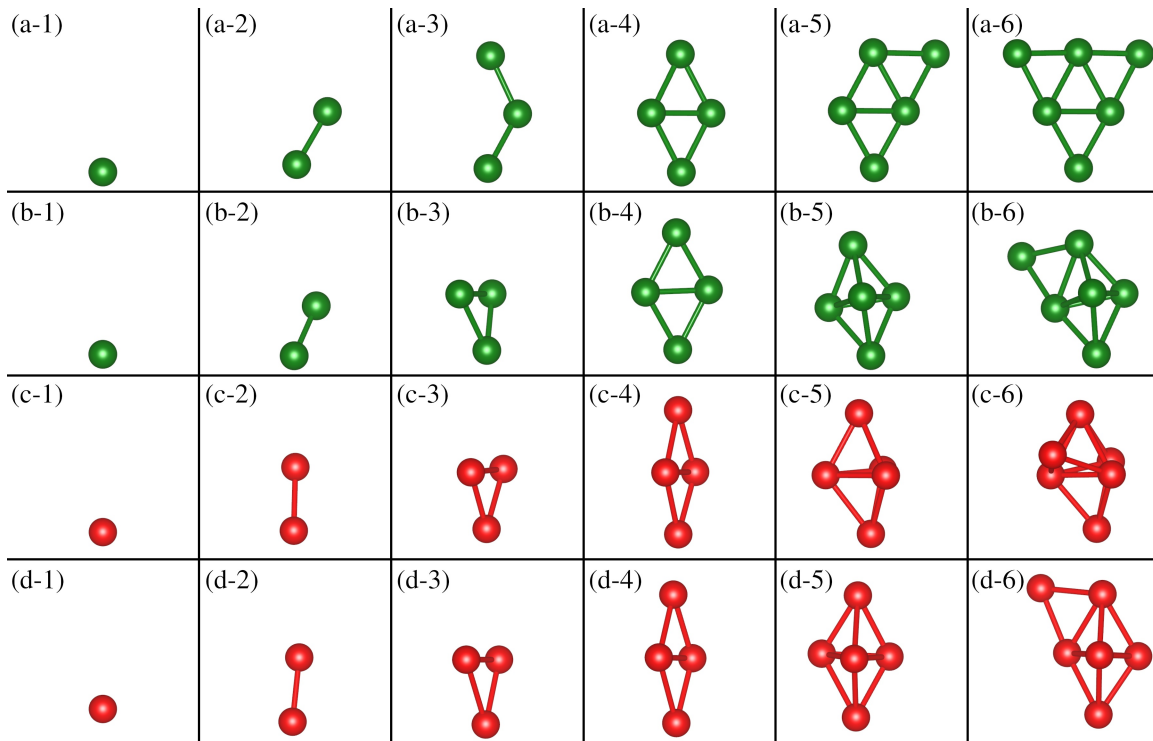

Supplement: d4nr02713b2.pdf [file d4nr02713b2.pdf]

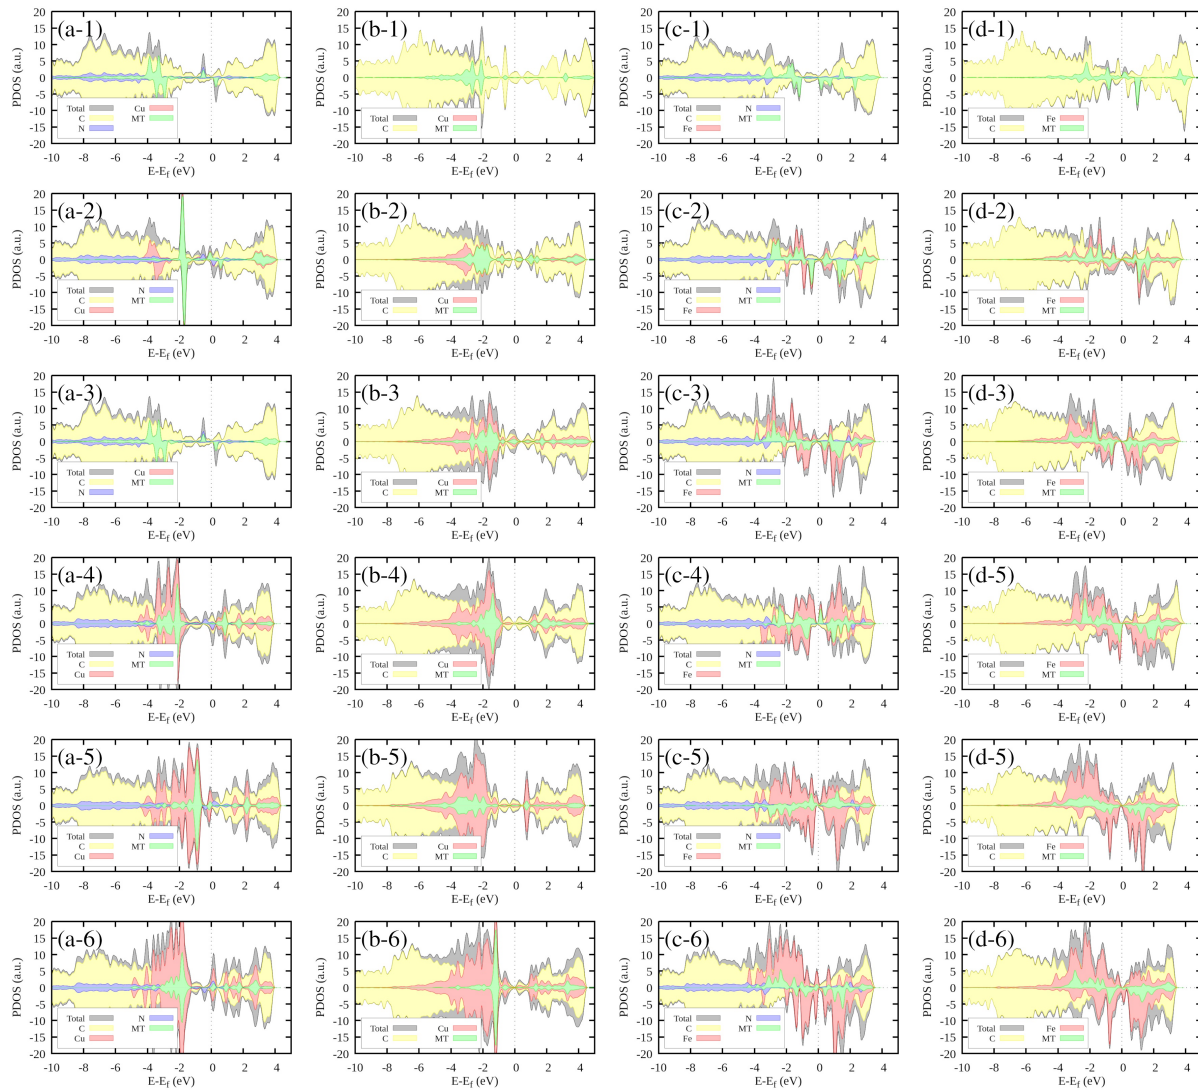

Supplement: d4nr02713b3.pdf [file d4nr02713b3.pdf]
